# Supplementary material for: Patent Ductus Arteriosus Stent Versus Surgical Aortopulmonary Shunt for Initial Palliation of Cyanotic Congenital Heart Disease with Ductal‐Dependent Pulmonary Blood Flow: A Systematic Review and Meta‐Analysis
Source: PubMed Central journal article supplement — J Am Heart Assoc. 2022 Jun 29;11(13):e024721. doi: 10.1161/JAHA.121.024721 (PMC9333373; doi:10.1161/jaha.121.024721), 2022-06-29

# **Supplemental Material**

**Figure S1. Newcastle Scales.**

**A. Amoogzar 2012**

**MODIFIED NEWCASTLE - OTTAWA QUALITY ASSESSMENT SCALE**

**COHORT STUDIES**

Note: A study can be awarded a maximum of one star for each numbered item within the Selection and Outcome categories. A maximum of two stars can be given for Comparability

| No.                  | Criterion                                                                        | Decision rule                                                                                                                                                                                                                                                                                                                                    | Score (*=1, no*=0) | Location in text |
|----------------------|----------------------------------------------------------------------------------|--------------------------------------------------------------------------------------------------------------------------------------------------------------------------------------------------------------------------------------------------------------------------------------------------------------------------------------------------|--------------------|------------------|
| <b>SELECTION</b>     |                                                                                  |                                                                                                                                                                                                                                                                                                                                                  |                    |                  |
| 1                    | Representativeness of the exposed cohort                                         | a) Consecutive eligible participants were selected, participants were randomly selected, or all participants were invited to participate from the source population*<br>b) Not satisfying requirements in part (a), or not stated.                                                                                                               | 0                  |                  |
| 2                    | Selection of the non-exposed cohort                                              | a) Selected from the same source population*<br>b) Selected from a different source population<br>c) No description                                                                                                                                                                                                                              | 1                  |                  |
| 3                    | Ascertainment of exposure                                                        | a) Structured injury data (e.g. record completed by medical staff)*<br>b) Structured interview*<br>c) Written self-report<br>d) No description                                                                                                                                                                                                   | 1                  |                  |
| 4                    | Demonstration that outcome of interest was not present at the start of the study | a) Yes*<br>b) No or not explicitly stated                                                                                                                                                                                                                                                                                                        | 1                  |                  |
| <b>COMPARABILITY</b> |                                                                                  |                                                                                                                                                                                                                                                                                                                                                  |                    |                  |
| 1                    | Comparability of cohorts on the basis of the design or analysis                  | a) Study controls for previous injury*<br>b) Study controls for age*<br><br><i>Note:</i> Exposed and non-exposed individuals must be matched in the design and/or confounders must be adjusted for in the analysis. Alone statements of no differences between groups or that differences were not statistically significant are not sufficient. | 0                  |                  |
| <b>OUTCOME</b>       |                                                                                  |                                                                                                                                                                                                                                                                                                                                                  |                    |                  |
| 1                    | Assessment of outcome                                                            | a) Independent or blind assessment stated, or confirmation of the outcome by reference to secure records (e.g. imaging, structured injury data, etc.)*<br>b) record linkage (e.g. identified through ICD codes on database records)*<br>c) Self-report with no reference to original structured injury data or imaging<br>d) No description      | 1                  |                  |
| 2                    | Was follow-up long enough for outcomes to occur?                                 | a) Yes ( $\geq 3$ months)*<br>b) No ( $< 3$ months)                                                                                                                                                                                                                                                                                              | 1                  |                  |
| 3                    | Adequacy of follow up of cohorts                                                 | a) Complete follow up – all participants accounted for*<br>b) Subjects lost to follow up unlikely to introduce bias ( $< 15\%$ lost to follow up, or description provided of those lost*)<br>c) Follow up rate $< 85\%$ and no description of those lost provided<br>d) No statement                                                             | 1                  |                  |
| <b>SCORE:</b>        |                                                                                  |                                                                                                                                                                                                                                                                                                                                                  | <b>6</b>           |                  |

## B. Bentham 2018

### MODIFIED NEWCASTLE - OTTAWA QUALITY ASSESSMENT SCALE

#### COHORT STUDIES

Note: A study can be awarded a maximum of one star for each numbered item within the Selection and Outcome categories. A maximum of two stars can be given for Comparability

| No.                  | Criterion                                                                        | Decision rule                                                                                                                                                                                                                                                                                                                                    | Score (*=1, no*=0) | Location in text |
|----------------------|----------------------------------------------------------------------------------|--------------------------------------------------------------------------------------------------------------------------------------------------------------------------------------------------------------------------------------------------------------------------------------------------------------------------------------------------|--------------------|------------------|
| <b>SELECTION</b>     |                                                                                  |                                                                                                                                                                                                                                                                                                                                                  |                    |                  |
| 1                    | Representativeness of the exposed cohort                                         | a) Consecutive eligible participants were selected, participants were randomly selected, or all participants were invited to participate from the source population*<br>b) Not satisfying requirements in part (a), or not stated.                                                                                                               | 1                  |                  |
| 2                    | Selection of the non-exposed cohort                                              | a) Selected from the same source population*<br>b) Selected from a different source population<br>c) No description                                                                                                                                                                                                                              | 1                  |                  |
| 3                    | Ascertainment of exposure                                                        | a) Structured injury data (e.g. record completed by medical staff)*<br>b) Structured interview*<br>c) Written self-report<br>d) No description                                                                                                                                                                                                   | 1                  |                  |
| 4                    | Demonstration that outcome of interest was not present at the start of the study | a) Yes*<br>b) No or not explicitly stated                                                                                                                                                                                                                                                                                                        | 1                  |                  |
| <b>COMPARABILITY</b> |                                                                                  |                                                                                                                                                                                                                                                                                                                                                  |                    |                  |
| 1                    | Comparability of cohorts on the basis of the design or analysis                  | a) Study controls for previous injury*<br>b) Study controls for age*<br><br><i>Note:</i> Exposed and non-exposed individuals must be matched in the design and/or confounders must be adjusted for in the analysis. Alone statements of no differences between groups or that differences were not statistically significant are not sufficient. | 1                  |                  |
| <b>OUTCOME</b>       |                                                                                  |                                                                                                                                                                                                                                                                                                                                                  |                    |                  |
| 1                    | Assessment of outcome                                                            | a) Independent or blind assessment stated, or confirmation of the outcome by reference to secure records (e.g. imaging, structured injury data, etc.)*<br>b) record linkage (e.g. identified through ICD codes on database records)*<br>c) Self-report with no reference to original structured injury data or imaging<br>d) No description      | 1                  |                  |
| 2                    | Was follow-up long enough for outcomes to occur?                                 | a) Yes ( $\geq 3$ months)*<br>b) No (<3 months)                                                                                                                                                                                                                                                                                                  | 1                  |                  |
| 3                    | Adequacy of follow up of cohorts                                                 | a) Complete follow up – all participants accounted for*<br>b) Subjects lost to follow up unlikely to introduce bias (<15% lost to follow up, or description provided of those lost*)<br>c) Follow up rate <85% and no description of those lost provided<br>d) No statement                                                                      | 1                  |                  |
| <b>SCORE:</b>        |                                                                                  |                                                                                                                                                                                                                                                                                                                                                  | <b>8</b>           |                  |

## C. Glatz 2018

### MODIFIED NEWCASTLE - OTTAWA QUALITY ASSESSMENT SCALE

#### COHORT STUDIES

Note: A study can be awarded a maximum of one star for each numbered item within the Selection and Outcome categories. A maximum of two stars can be given for Comparability

| No.                  | Criterion                                                                        | Decision rule                                                                                                                                                                                                                                                                                                                                    | Score (*=1, no*=0) | Location in text |
|----------------------|----------------------------------------------------------------------------------|--------------------------------------------------------------------------------------------------------------------------------------------------------------------------------------------------------------------------------------------------------------------------------------------------------------------------------------------------|--------------------|------------------|
| <b>SELECTION</b>     |                                                                                  |                                                                                                                                                                                                                                                                                                                                                  |                    |                  |
| 1                    | Representativeness of the exposed cohort                                         | a) Consecutive eligible participants were selected, participants were randomly selected, or all participants were invited to participate from the source population*<br>b) Not satisfying requirements in part (a), or not stated.                                                                                                               | 1                  |                  |
| 2                    | Selection of the non-exposed cohort                                              | a) Selected from the same source population*<br>b) Selected from a different source population<br>c) No description                                                                                                                                                                                                                              | 1                  |                  |
| 3                    | Ascertainment of exposure                                                        | a) Structured injury data (e.g. record completed by medical staff)*<br>b) Structured interview*<br>c) Written self-report<br>d) No description                                                                                                                                                                                                   | 1                  |                  |
| 4                    | Demonstration that outcome of interest was not present at the start of the study | a) Yes*<br>b) No or not explicitly stated                                                                                                                                                                                                                                                                                                        | 1                  |                  |
| <b>COMPARABILITY</b> |                                                                                  |                                                                                                                                                                                                                                                                                                                                                  |                    |                  |
| 1                    | Comparability of cohorts on the basis of the design or analysis                  | a) Study controls for previous injury*<br>b) Study controls for age*<br><br><i>Note:</i> Exposed and non-exposed individuals must be matched in the design and/or confounders must be adjusted for in the analysis. Alone statements of no differences between groups or that differences were not statistically significant are not sufficient. | 1                  |                  |
| <b>OUTCOME</b>       |                                                                                  |                                                                                                                                                                                                                                                                                                                                                  |                    |                  |
| 1                    | Assessment of outcome                                                            | a) Independent or blind assessment stated, or confirmation of the outcome by reference to secure records (e.g. imaging, structured injury data, etc.)*<br>b) record linkage (e.g. identified through ICD codes on database records)*<br>c) Self-report with no reference to original structured injury data or imaging<br>d) No description      | 1                  |                  |
| 2                    | Was follow-up long enough for outcomes to occur?                                 | a) Yes ( $\geq 3$ months)*<br>b) No ( $< 3$ months)                                                                                                                                                                                                                                                                                              | 1                  |                  |
| 3                    | Adequacy of follow up of cohorts                                                 | a) Complete follow up – all participants accounted for*<br>b) Subjects lost to follow up unlikely to introduce bias ( $< 15\%$ lost to follow up, or description provided of those lost*)<br>c) Follow up rate $< 85\%$ and no description of those lost provided<br>d) No statement                                                             | 1                  |                  |
| <b>SCORE:</b>        |                                                                                  |                                                                                                                                                                                                                                                                                                                                                  | <b>8</b>           |                  |

## D. Mallula 2014

### MODIFIED NEWCASTLE - OTTAWA QUALITY ASSESSMENT SCALE

#### COHORT STUDIES

Note: A study can be awarded a maximum of one star for each numbered item within the Selection and Outcome categories. A maximum of two stars can be given for Comparability

| No.                  | Criterion                                                                        | Decision rule                                                                                                                                                                                                                                                                                                                                    | Score (*=1, no*=0) | Location in text |
|----------------------|----------------------------------------------------------------------------------|--------------------------------------------------------------------------------------------------------------------------------------------------------------------------------------------------------------------------------------------------------------------------------------------------------------------------------------------------|--------------------|------------------|
| <b>SELECTION</b>     |                                                                                  |                                                                                                                                                                                                                                                                                                                                                  |                    |                  |
| 1                    | Representativeness of the exposed cohort                                         | a) Consecutive eligible participants were selected, participants were randomly selected, or all participants were invited to participate from the source population*<br>b) Not satisfying requirements in part (a), or not stated.                                                                                                               | 1                  |                  |
| 2                    | Selection of the non-exposed cohort                                              | a) Selected from the same source population*<br>b) Selected from a different source population<br>c) No description                                                                                                                                                                                                                              | 1                  |                  |
| 3                    | Ascertainment of exposure                                                        | a) Structured injury data (e.g. record completed by medical staff)*<br>b) Structured interview*<br>c) Written self-report<br>d) No description                                                                                                                                                                                                   | 1                  |                  |
| 4                    | Demonstration that outcome of interest was not present at the start of the study | a) Yes*<br>b) No or not explicitly stated                                                                                                                                                                                                                                                                                                        | 1                  |                  |
| <b>COMPARABILITY</b> |                                                                                  |                                                                                                                                                                                                                                                                                                                                                  |                    |                  |
| 1                    | Comparability of cohorts on the basis of the design or analysis                  | a) Study controls for previous injury*<br>b) Study controls for age*<br><br><i>Note:</i> Exposed and non-exposed individuals must be matched in the design and/or confounders must be adjusted for in the analysis. Alone statements of no differences between groups or that differences were not statistically significant are not sufficient. | 0                  |                  |
| <b>OUTCOME</b>       |                                                                                  |                                                                                                                                                                                                                                                                                                                                                  |                    |                  |
| 1                    | Assessment of outcome                                                            | a) Independent or blind assessment stated, or confirmation of the outcome by reference to secure records (e.g. imaging, structured injury data, etc.)*<br>b) record linkage (e.g. identified through ICD codes on database records)*<br>c) Self-report with no reference to original structured injury data or imaging<br>d) No description      | 1                  |                  |
| 2                    | Was follow-up long enough for outcomes to occur?                                 | a) Yes ( $\geq 3$ months)*<br>b) No ( $< 3$ months)                                                                                                                                                                                                                                                                                              | 1                  |                  |
| 3                    | Adequacy of follow up of cohorts                                                 | a) Complete follow up – all participants accounted for*<br>b) Subjects lost to follow up unlikely to introduce bias ( $< 15\%$ lost to follow up, or description provided of those lost*)<br>c) Follow up rate $< 85\%$ and no description of those lost provided<br>d) No statement                                                             | 1                  |                  |
| <b>SCORE:</b>        |                                                                                  |                                                                                                                                                                                                                                                                                                                                                  | <b>7</b>           |                  |

## E. McMullan 2014

### MODIFIED NEWCASTLE - OTTAWA QUALITY ASSESSMENT SCALE

#### COHORT STUDIES

Note: A study can be awarded a maximum of one star for each numbered item within the Selection and Outcome categories. A maximum of two stars can be given for Comparability

| No.                  | Criterion                                                                        | Decision rule                                                                                                                                                                                                                                                                                                                                    | Score (*=1, no*=0) | Location in text |
|----------------------|----------------------------------------------------------------------------------|--------------------------------------------------------------------------------------------------------------------------------------------------------------------------------------------------------------------------------------------------------------------------------------------------------------------------------------------------|--------------------|------------------|
| <b>SELECTION</b>     |                                                                                  |                                                                                                                                                                                                                                                                                                                                                  |                    |                  |
| 1                    | Representativeness of the exposed cohort                                         | a) Consecutive eligible participants were selected, participants were randomly selected, or all participants were invited to participate from the source population*<br>b) Not satisfying requirements in part (a), or not stated.                                                                                                               | 1                  |                  |
| 2                    | Selection of the non-exposed cohort                                              | a) Selected from the same source population*<br>b) Selected from a different source population<br>c) No description                                                                                                                                                                                                                              | 1                  |                  |
| 3                    | Ascertainment of exposure                                                        | a) Structured injury data (e.g. record completed by medical staff)*<br>b) Structured interview*<br>c) Written self-report<br>d) No description                                                                                                                                                                                                   | 1                  |                  |
| 4                    | Demonstration that outcome of interest was not present at the start of the study | a) Yes*<br>b) No or not explicitly stated                                                                                                                                                                                                                                                                                                        | 1                  |                  |
| <b>COMPARABILITY</b> |                                                                                  |                                                                                                                                                                                                                                                                                                                                                  |                    |                  |
| 1                    | Comparability of cohorts on the basis of the design or analysis                  | a) Study controls for previous injury*<br>b) Study controls for age*<br><br><i>Note: Exposed and non-exposed individuals must be matched in the design and/or confounders must be adjusted for in the analysis. Alone statements of no differences between groups or that differences were not statistically significant are not sufficient.</i> | 0                  |                  |
| <b>OUTCOME</b>       |                                                                                  |                                                                                                                                                                                                                                                                                                                                                  |                    |                  |
| 1                    | Assessment of outcome                                                            | a) Independent or blind assessment stated, or confirmation of the outcome by reference to secure records (e.g. imaging, structured injury data, etc.)*<br>b) record linkage (e.g. identified through ICD codes on database records)*<br>c) Self-report with no reference to original structured injury data or imaging<br>d) No description      | 1                  |                  |
| 2                    | Was follow-up long enough for outcomes to occur?                                 | a) Yes ( $\geq 3$ months)*<br>b) No ( $< 3$ months)                                                                                                                                                                                                                                                                                              | 1                  |                  |
| 3                    | Adequacy of follow up of cohorts                                                 | a) Complete follow up – all participants accounted for*<br>b) Subjects lost to follow up unlikely to introduce bias ( $< 15\%$ lost to follow up, or description provided of those lost*)<br>c) Follow up rate $< 85\%$ and no description of those lost provided<br>d) No statement                                                             | 1                  |                  |
| <b>SCORE:</b>        |                                                                                  |                                                                                                                                                                                                                                                                                                                                                  | <b>7</b>           |                  |

F. Santoro 2009

MODIFIED NEWCASTLE - OTTAWA QUALITY ASSESSMENT SCALE

COHORT STUDIES

Note: A study can be awarded a maximum of one star for each numbered item within the Selection and Outcome categories. A maximum of two stars can be given for Comparability

| No.                  | Criterion                                                                        | Decision rule                                                                                                                                                                                                                                                                                                                                    | Score (*=1, no*=0) | Location in text |
|----------------------|----------------------------------------------------------------------------------|--------------------------------------------------------------------------------------------------------------------------------------------------------------------------------------------------------------------------------------------------------------------------------------------------------------------------------------------------|--------------------|------------------|
| <b>SELECTION</b>     |                                                                                  |                                                                                                                                                                                                                                                                                                                                                  |                    |                  |
| 1                    | Representativeness of the exposed cohort                                         | a) Consecutive eligible participants were selected, participants were randomly selected, or all participants were invited to participate from the source population*<br>b) Not satisfying requirements in part (a), or not stated.                                                                                                               | 0                  |                  |
| 2                    | Selection of the non-exposed cohort                                              | a) Selected from the same source population*<br>b) Selected from a different source population<br>c) No description                                                                                                                                                                                                                              | 1                  |                  |
| 3                    | Ascertainment of exposure                                                        | a) Structured injury data (e.g. record completed by medical staff)*<br>b) Structured interview*<br>c) Written self-report<br>d) No description                                                                                                                                                                                                   | 1                  |                  |
| 4                    | Demonstration that outcome of interest was not present at the start of the study | a) Yes*<br>b) No or not explicitly stated                                                                                                                                                                                                                                                                                                        | 1                  |                  |
| <b>COMPARABILITY</b> |                                                                                  |                                                                                                                                                                                                                                                                                                                                                  |                    |                  |
| 1                    | Comparability of cohorts on the basis of the design or analysis                  | a) Study controls for previous injury*<br>b) Study controls for age*<br><br><i>Note: Exposed and non-exposed individuals must be matched in the design and/or confounders must be adjusted for in the analysis. Alone statements of no differences between groups or that differences were not statistically significant are not sufficient.</i> | 0                  |                  |
| <b>OUTCOME</b>       |                                                                                  |                                                                                                                                                                                                                                                                                                                                                  |                    |                  |
| 1                    | Assessment of outcome                                                            | a) Independent or blind assessment stated, or confirmation of the outcome by reference to secure records (e.g. imaging, structured injury data, etc.)*<br>b) record linkage (e.g. identified through ICD codes on database records)*<br>c) Self-report with no reference to original structured injury data or imaging<br>d) No description      | 1                  |                  |
| 2                    | Was follow-up long enough for outcomes to occur?                                 | a) Yes ( $\geq 3$ months)*<br>b) No ( $< 3$ months)                                                                                                                                                                                                                                                                                              | 1                  |                  |
| 3                    | Adequacy of follow up of cohorts                                                 | a) Complete follow up – all participants accounted for*<br>b) Subjects lost to follow up unlikely to introduce bias ( $< 15\%$ lost to follow up, or description provided of those lost*)<br>c) Follow up rate $< 85\%$ and no description of those lost provided<br>d) No statement                                                             | 1                  |                  |
| <b>SCORE:</b>        |                                                                                  |                                                                                                                                                                                                                                                                                                                                                  | <b>6</b>           |                  |

**Figure S2. Funnel Plots.**

**A. Complications**

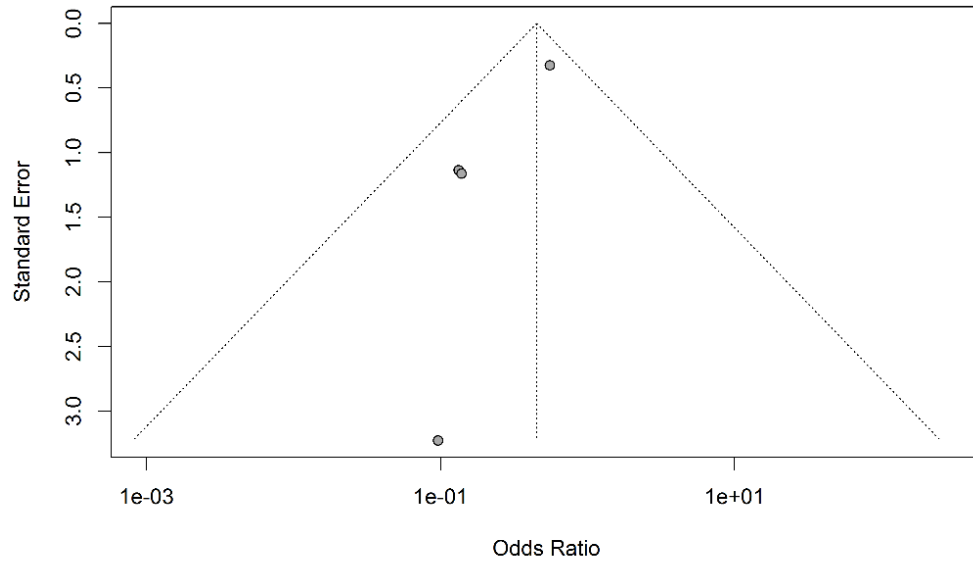

**B. Unplanned reinterventions**

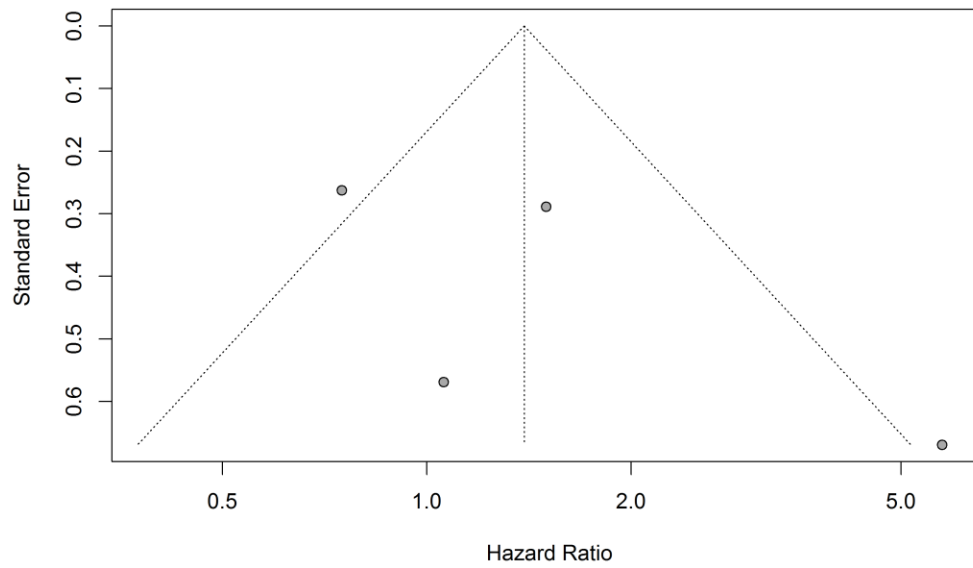



**C. Intensive care unit length of stay**

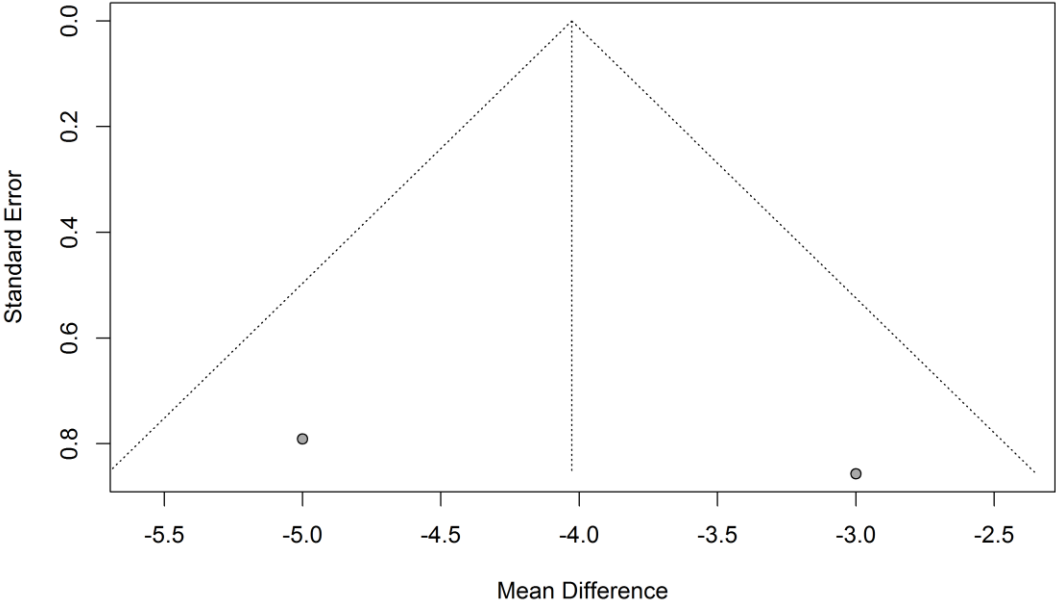

**D. Hospital length of stay**

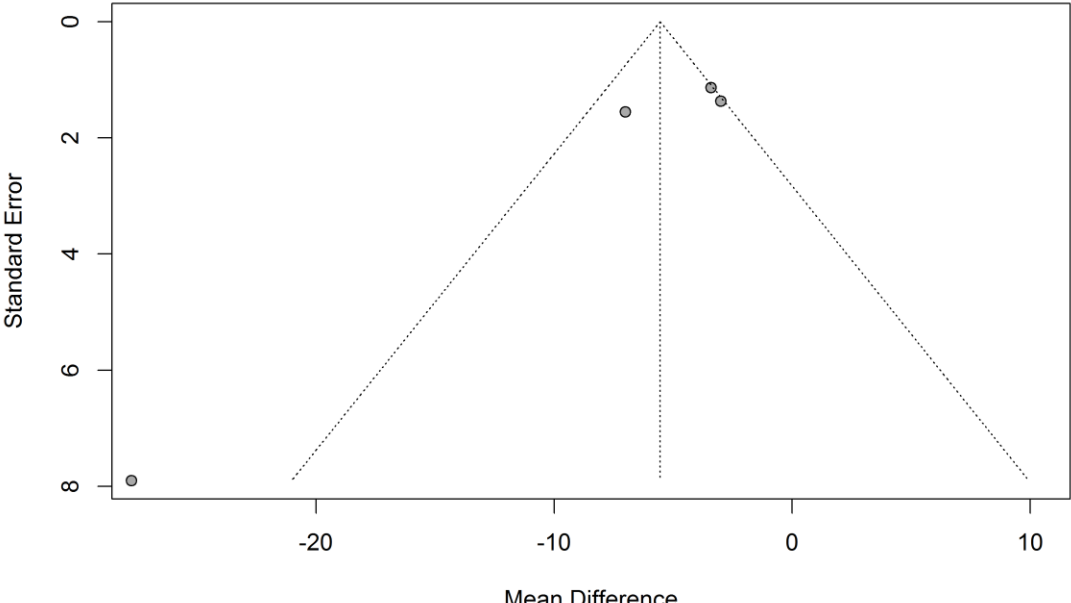

**E. Duration of mechanical ventilation**

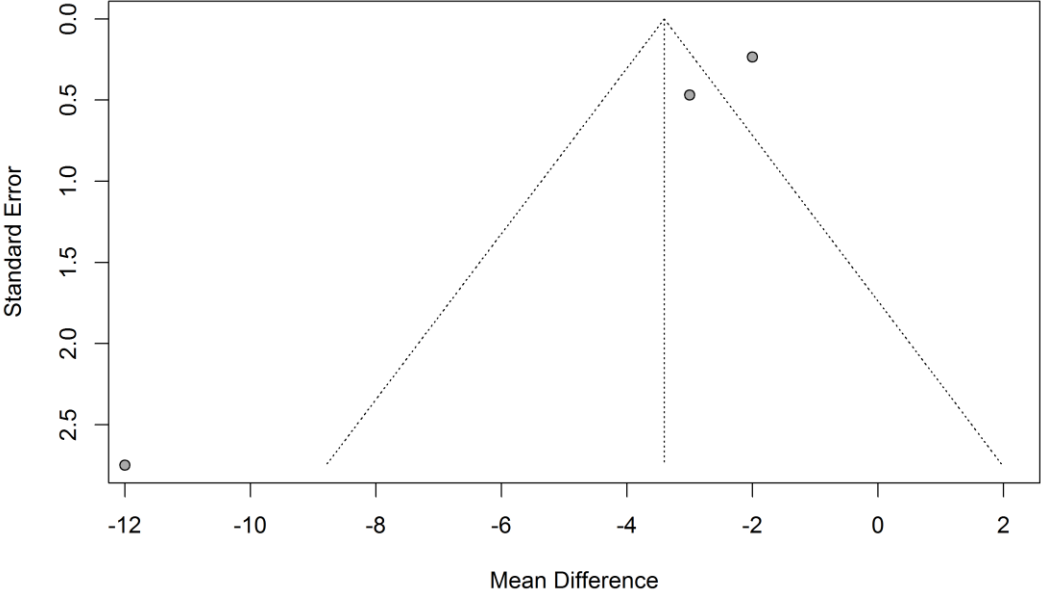

**F. Mortality**

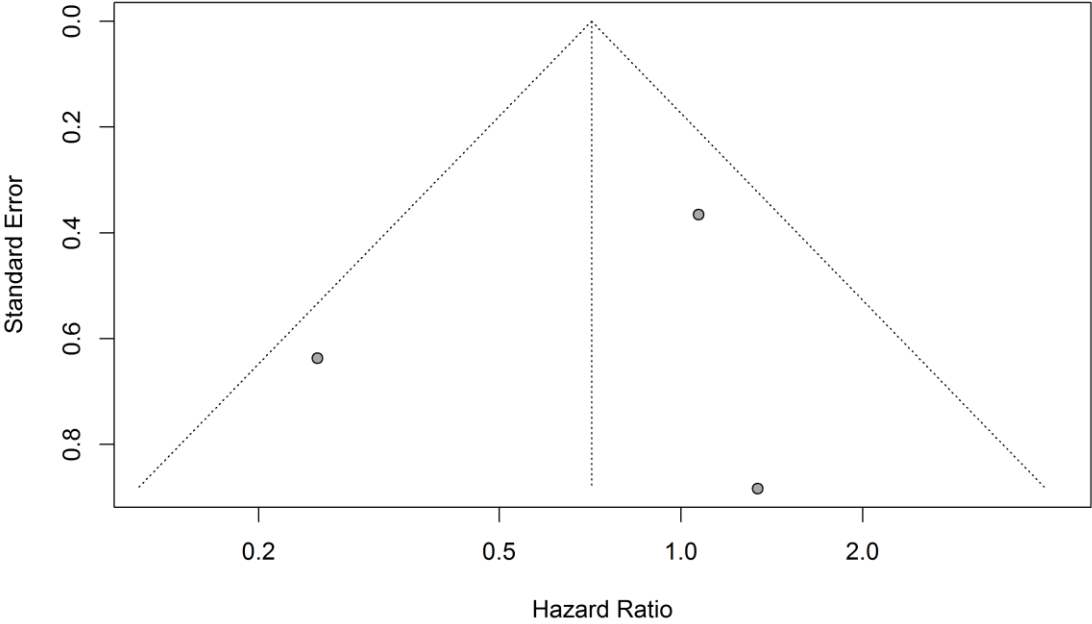

**G. Extracorporeal membrane oxygenation**

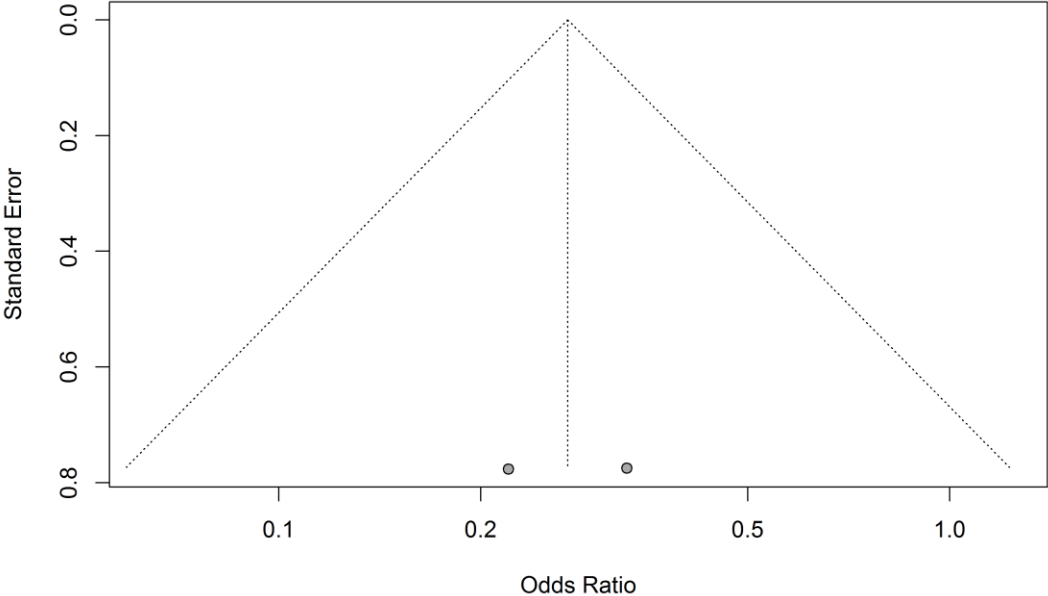

**H. Nakata index**

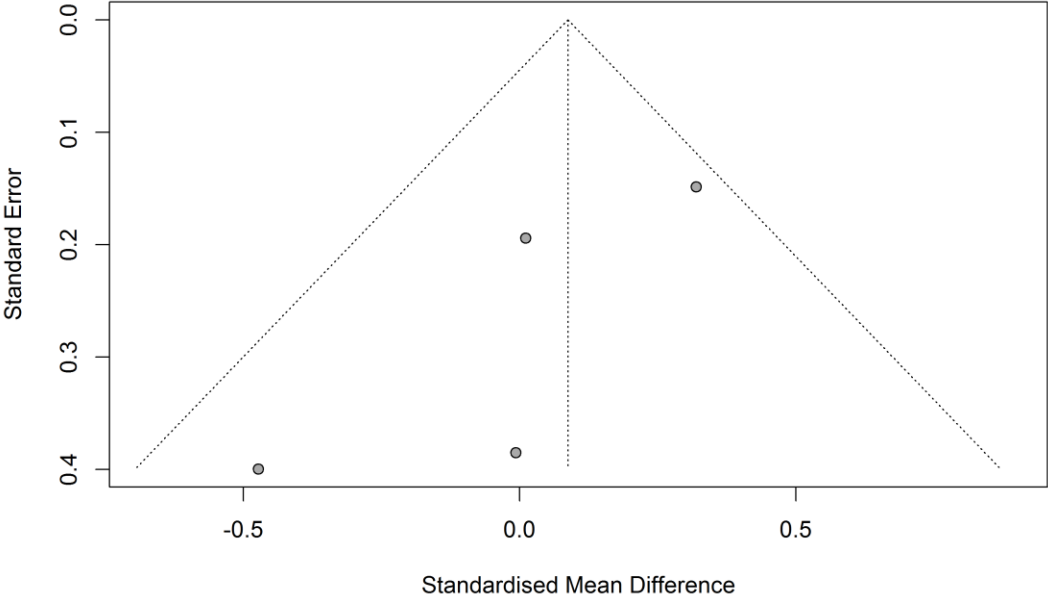

## I. Pulmonary artery symmetry index

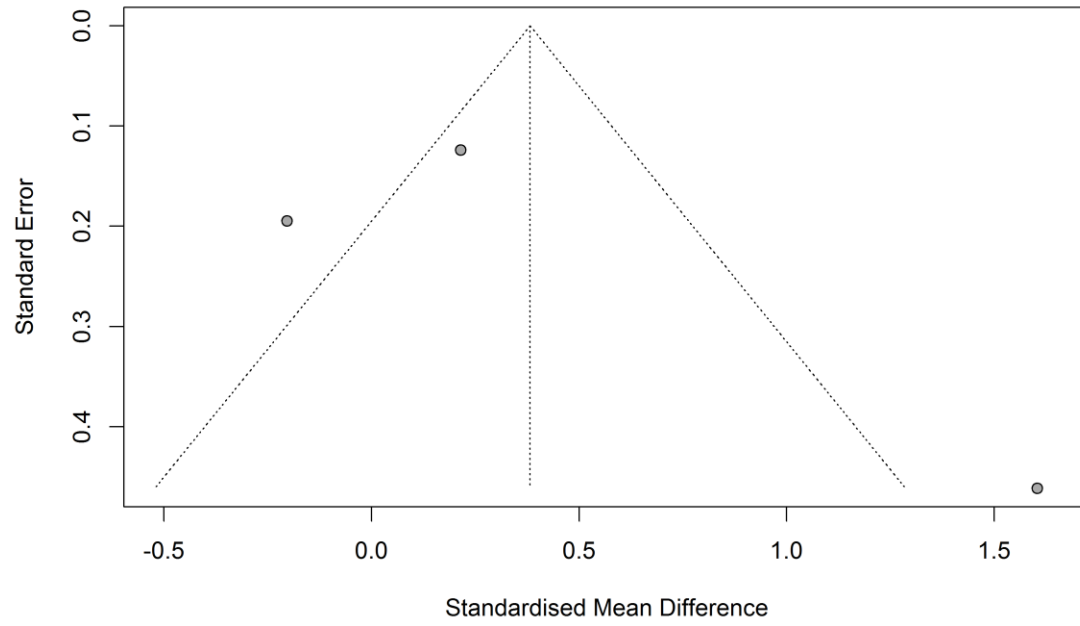

**Figure S3. 'Trim and Fill' Analysis.**

**A. Complications**

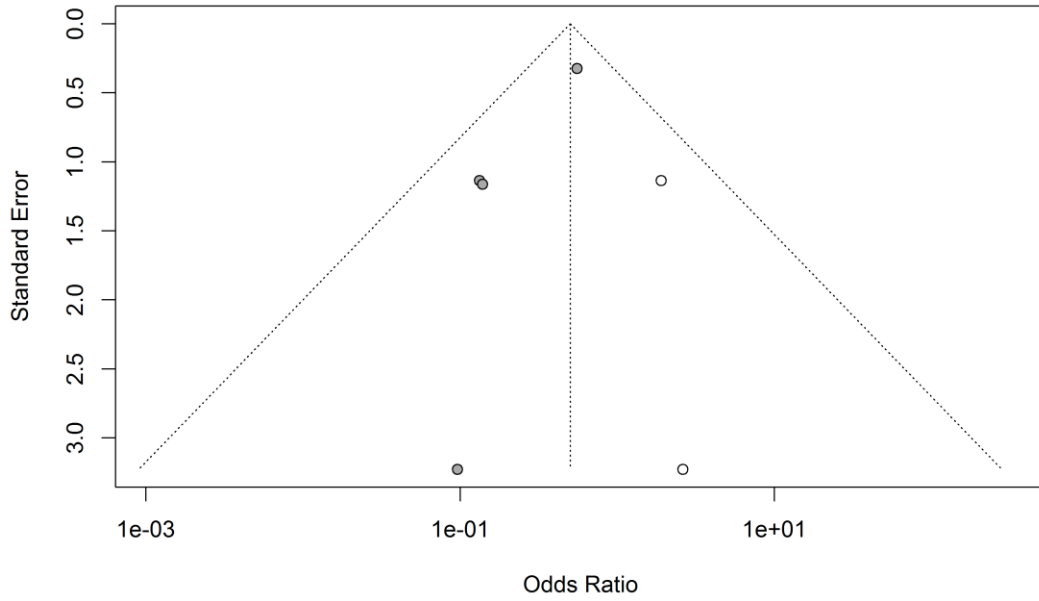

**B. Unplanned reinterventions**

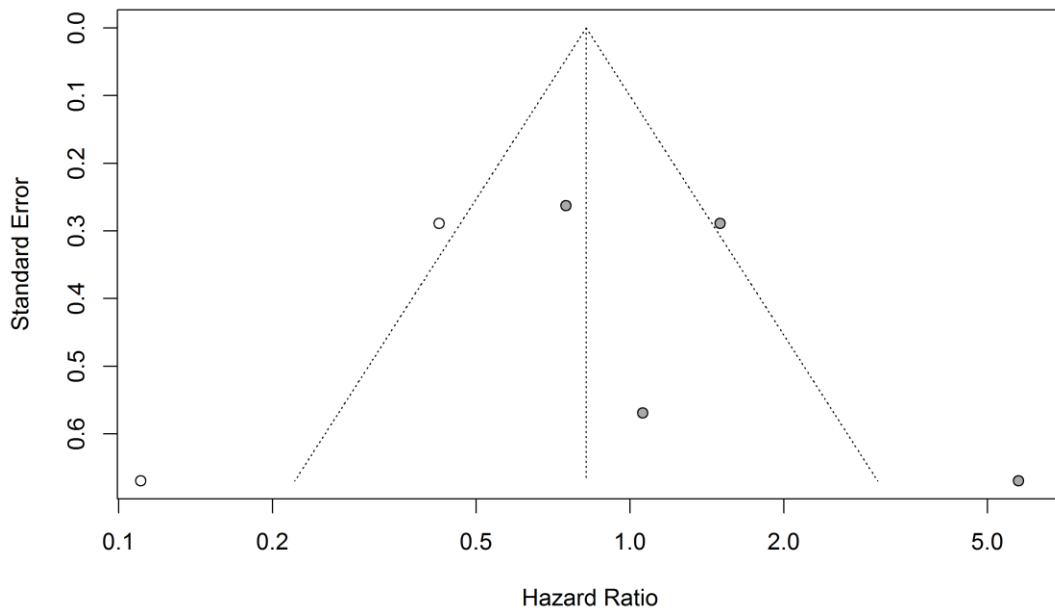

### C. Hospital length of stay

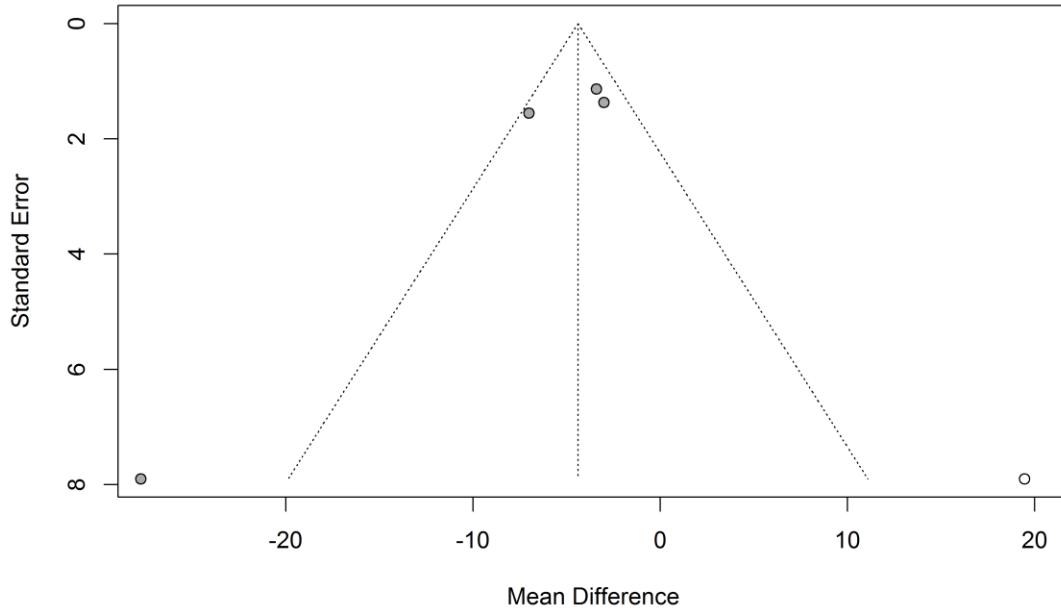

### J. Duration of mechanical ventilation

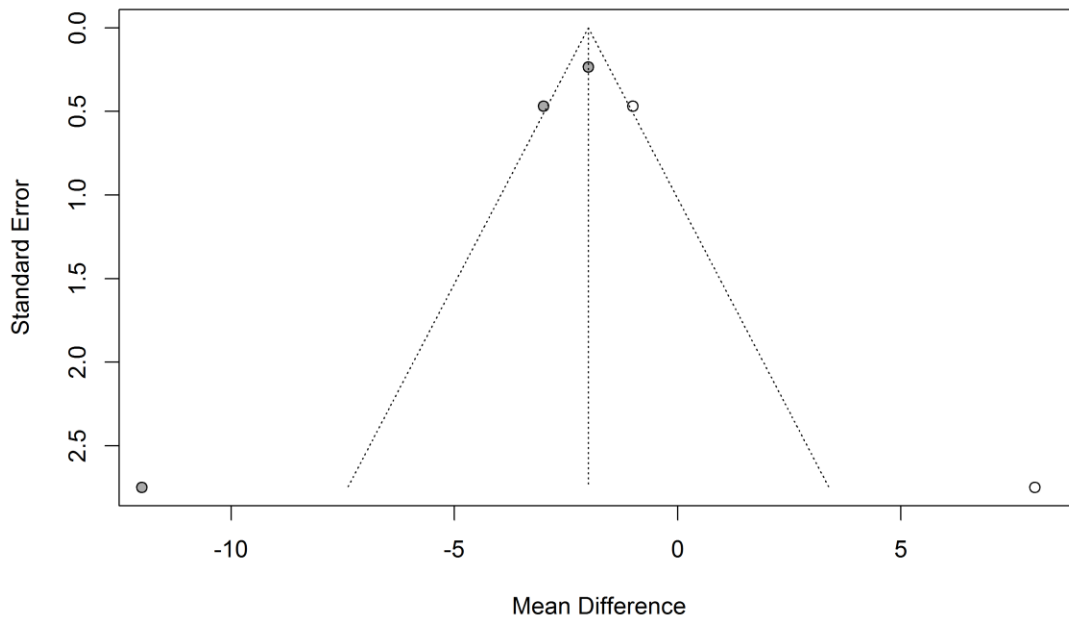

**K. Mortality**

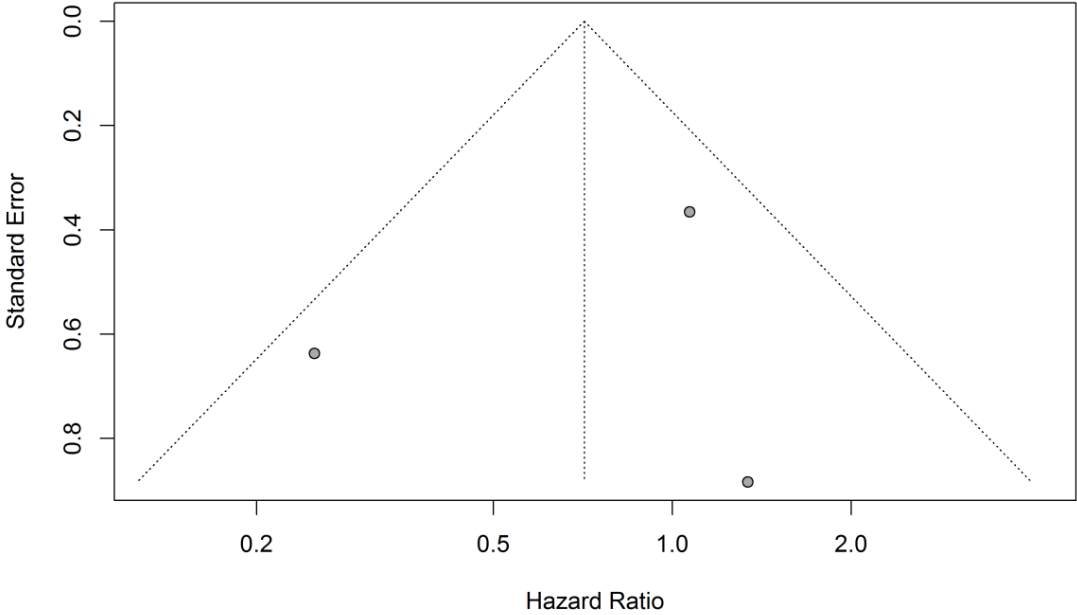

**L. Nakata index**

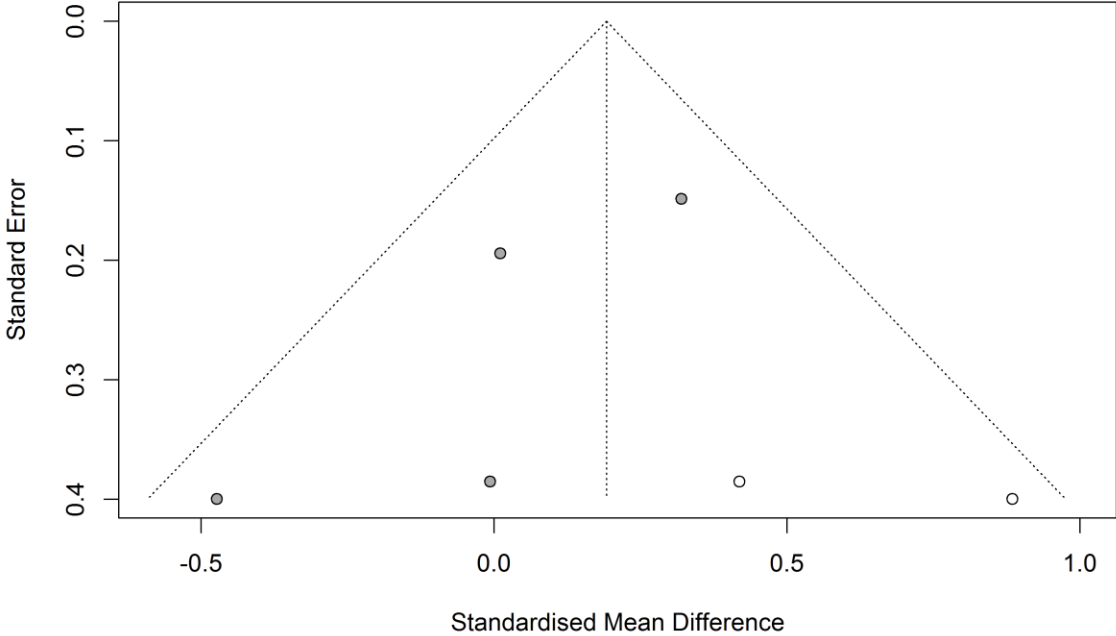

**M. Pulmonary artery symmetry index**

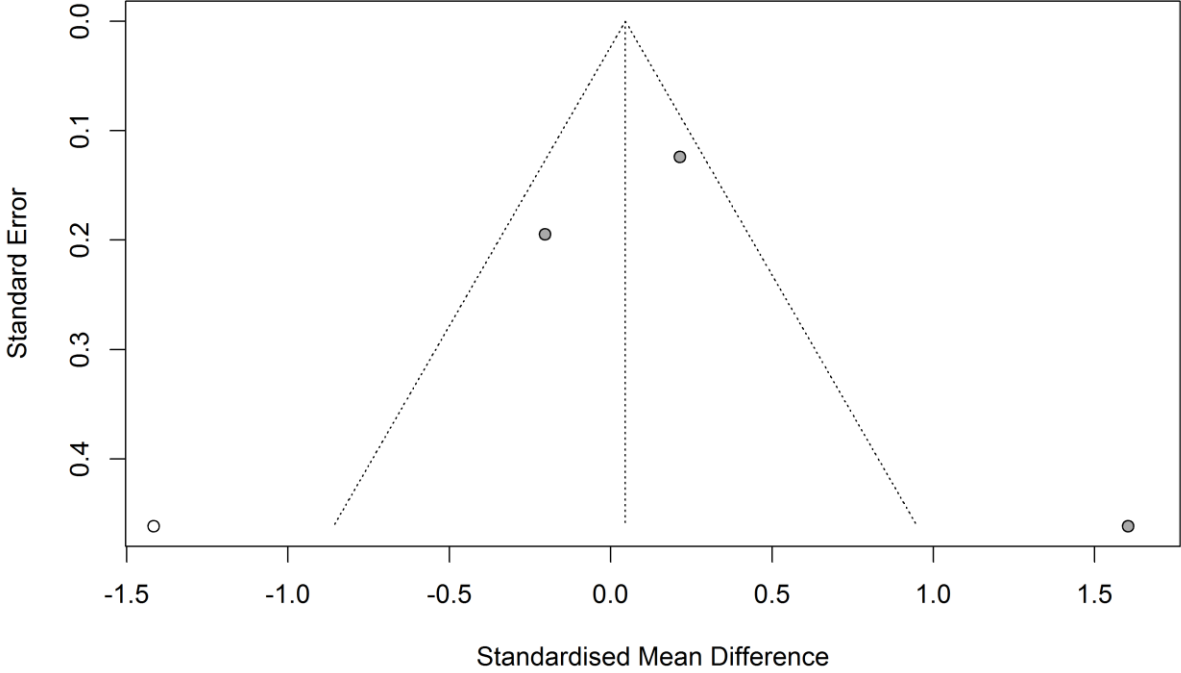

Supplement: JAH3-11-e024721-s001.pdf [file JAH3-11-e024721-s001.pdf]
